# Supplementary material for: IMPLEMENTATION OF BEST PRACTICE GOAL-SETTING IN FIVE REHABILITATION SERVICES: A MIXED-METHODS EVALUATION STUDY
Source: PubMed Central journal article supplement — J Rehabil Med. 2023 Aug 7;55:4471. doi: 10.2340/jrm.v55.4471 (PMC10424097; doi:10.2340/jrm.v55.4471), 2023-08-07
Supplement: JRM-55-4471-s002.pdf [file JRM-55-4471-s002.pdf]

Supplementary material has been published as submitted. It has not been copyedited, typeset or checked for scientific content by Journal of Rehabilitation Medicine

**Table SI. Changes in the inclusion of action planning, coping planning, feedback and review for each occasion of goal-setting**

| <b>Site</b>                      | <b>Staff action planning n(%)</b> | <b>Client action planning n(%)</b> | <b>Coping planning n(%)</b> | <b>Feedback and review n(%)</b> |
|----------------------------------|-----------------------------------|------------------------------------|-----------------------------|---------------------------------|
| <b><i>Site 1- Inpatients</i></b> |                                   |                                    |                             |                                 |
| Pre (n=77)                       | 19 (24.7)                         | 6 (7.8)                            | 1 (1.3)                     | 6 (7.8)                         |
| Post (n=85)                      | 44 (51.8)                         | 31 (36.5)                          | 3 (3.5)                     | 27 (31.8)                       |
| Follow up (n=26)                 | 25 (96.2)                         | 5 (19.2)                           | 0 (0.0)                     | 10 (38.5)                       |
| <b><i>Site 2- Inpatients</i></b> |                                   |                                    |                             |                                 |
| Pre (n=98)                       | 34 (34.7)                         | 10 (10.2)                          | 4 (4.1)                     | 9 (9.2)                         |
| Post (n=106)                     | 43 (40.6)                         | 33 (31.1)                          | 4 (3.8)                     | 19 (17.9)                       |
| Follow up (n=39)                 | 26 (66.7)                         | 9 (23.1)                           | 0 (0.0)                     | 11 (28.2)                       |
| <b><i>Site 3- Inpatients</i></b> |                                   |                                    |                             |                                 |
| Pre (n=76)                       | 33 (43.4)                         | 20 (26.3)                          | 13 (17.1)                   | 6 (7.9)                         |
| Post (n=54)                      | 1 (1.9)                           | 7 (13.0)                           | 2 (3.7)                     | 5 (9.3)                         |
| Follow up (n=28)                 | 18 (64.3)                         | 0 (0.0)                            | 0 (0.0)                     | 6 (21.4)                        |
| <b><i>Site 4- Community</i></b>  |                                   |                                    |                             |                                 |
| Pre (n=56)                       | 38 (67.9)                         | 14 (25.0)                          | 2 (3.6)                     | 25 (44.6)                       |
| Post (n=46)                      | 6 (13.0)                          | 16 (34.9)                          | 4 (8.7)                     | 26 (56.5)                       |
| Follow up (n=15)                 | 15 (100)                          | 15 (100)                           | 0 (0.0)                     | 1 (6.7)                         |
| <b><i>Site 5 -Community</i></b>  |                                   |                                    |                             |                                 |
| Pre (n=27)                       | 18 (66.7)                         | 9 (33.3)                           | 6 (22.2)                    | 14 (51.9)                       |
| Post (n=63)                      | 55 (87.3)                         | 27 (42.9)                          | 3 (4.8)                     | 8 (12.7)                        |
| Follow up (n=10)                 | 10(100)                           | 8 (80.0)                           | 1 (10.0)                    | 0 (0.0)                         |

**Table SII. Focus of rehabilitation goals set in each site as defined by activity and participation ICF categories**

|                                                         | Site 1- Inpatients |              |            | Site 2- Inpatients |              |            | Site 3 -Inpatients |              |            | Site 4- Community |              |            | Site 5 -Community |              |             |
|---------------------------------------------------------|--------------------|--------------|------------|--------------------|--------------|------------|--------------------|--------------|------------|-------------------|--------------|------------|-------------------|--------------|-------------|
|                                                         | Pre (n=219)        | Post (n=279) | FU (n=89)  | Pre (n=381)        | Post (n=310) | FU (n=127) | Pre (n=225)        | Post (n=189) | FU (n=136) | Pre (n=181)       | Post (n=146) | FU (n=96)  | Pre (n=114)       | Post (n=255) | FU (n=111)  |
| <b>Learning &amp; applying knowledge</b>                | -                  | -            | -          | -                  | -            | -          | -                  | -            | -          | 1 (0.6%)          | -            | -          | -                 | -            | -           |
| <b>General Tasks and demands</b>                        | -                  | 6 (2.2%)     | 2 (2.3%)   | 3 (0.8%)           | 13 (4.2%)    | 1 (0.8%)   | -                  | 3 (1.6%)     | 2 (1.5%)   | 4 (2.2%)          | 7 (4.8%)     | 1 (1.0%)   | 2 (1.8%)          | 6 (2.4%)     | -           |
| <b>Communication</b>                                    | 8 (3.7%)           | 13 (4.7%)    | -          | -                  | 8 (2.6%)     | -          | 3 (1.3%)           | 5 (2.6%)     | -          | 8 (4.4%)          | 8 (5.5%)     | -          | 5 (4.4%)          | 2 (0.8%)     | -           |
| <b>Mobility</b>                                         | 126 (57.5%)        | 125 (44.8%)  | 44 (49.4%) | 140 (36.7%)        | 137 (44.2%)  | 38 (29.9%) | 68 (30.2%)         | 86 (45.5%)   | 36 (26.5%) | 54 (29.8%)        | 41 (28.1%)   | 26 (27.1%) | 37 (32.5%)        | 80 (31.4%)   | 29 (26.13%) |
| <b>Self-care</b>                                        | 16 (7.3%)          | 48 (17.2%)   | 11 (12.4%) | 69 (18.1%)         | 59 (19.0%)   | 28 (22.1%) | 37 (16.4%)         | 31 (16.4%)   | 36 (26.5%) | 19 (10.5%)        | 10 (6.8%)    | 9 (9.4%)   | 3 (2.6%)          | 13 (5.1%)    | -           |
| <b>Domestic Life</b>                                    | 5 (2.3%)           | 24 (8.6%)    | 6 (6.7%)   | 30 (7.9%)          | 11 (3.5%)    | 2 (1.6%)   | 21 (9.3%)          | 15 (7.9%)    | 10 (7.4%)  | 3 (1.7%)          | 13 (8.9%)    | 3 (3.1%)   | 10 (8.8%)         | 24 (9.4%)    | 9 (8.1%)    |
| <b>Interprofessional interactions and relationships</b> | -                  | 2 (0.7%)     | -          | 1 (0.3%)           | 1 (0.3%)     | -          | -                  | -            | -          | 1 (0.6%)          | 2 (1.4%)     | -          | -                 | 1 (0.4%)     | -           |
| <b>Major Life areas</b>                                 | 2 (0.9%)           | 5 (1.8%)     | 1 (1.1%)   | 7 (1.8%)           | 10 (3.2%)    | 4 (3.2%)   | 5 (2.2%)           | -            | -          | 20 (11%)          | 8 (5.5%)     | 10 (10.4%) | 10 (8.8%)         | 5 (2.0%)     | 11 (9.9%)   |
| <b>Community Social and Civil life</b>                  | 10 (4.6%)          | 8 (2.9%)     | 2 (2.3%)   | 9 (2.4%)           | 10 (3.2%)    | 1 (0.8%)   | 3 (1.3%)           | 2 (1.1%)     | 1 (0.7%)   | 17 (9.4%)         | 12 (8.2%)    | 19 (19.8%) | 13 (11.4%)        | 26 (10.2%)   | 14 (12.6%)  |
| <b>Impairments</b>                                      | 16 (7.3%)          | 22 (7.9%)    | 8 (9.0%)   | 34 (8.9%)          | 17 (5.5%)    | 10 (7.9%)  | 43 (19.1%)         | 20 (10.6%)   | 28 (20.6%) | 47 (26%)          | 38 (26.0%)   | -          | 26 (22.8%)        | 70 (27.5%)   | 31 (28.0%)  |
| <b>Staff Actions</b>                                    | 24 (11%)           | 9 (3.2%)     | 4 (4.5%)   | 74 (19.4%)         | 22 (7.1%)    | 18 (14.2%) | 42 (18.7%)         | 22 (11.6%)   | 13 (9.6%)  | 4 (2.2%)          | 5 (3.4%)     | 3 (3.1%)   | 7 (6.1%)          | 19 (7.5%)    | 12 (10.8%)  |
| <b>Uncodeable</b>                                       | 12 (5.5%)          | 17 (6.1%)    | 11 (12.4%) | 14 (3.7%)          | 22 (7.1%)    | 26 (20.5%) | 3 (1.3%)           | 5 (2.6%)     | 10 (7.4%)  | 3 (1.7%)          | 2 (1.4%)     | 2 (2.1%)   | 1 (0.9%)          | 9 (3.5%)     | 5 (4.5%)    |

FU=Follow up phase

**Table SIII. Client-centeredness of Goal-setting (C-COGS) and Client interview questions**

| C-COGS categories                            | Site 1- Inpatients |       |                   | Site 2- Inpatients |       |                  | Site 3 -Inpatients |       |                  | Site 4- Community |       |                   | Site 5 -Community |       |                   |
|----------------------------------------------|--------------------|-------|-------------------|--------------------|-------|------------------|--------------------|-------|------------------|-------------------|-------|-------------------|-------------------|-------|-------------------|
|                                              | Pre                | Post  | P value (OR, CI)  | Pre                | Post  | P value (OR, CI) | Pre                | Post  | P value (OR, CI) | Pre               | Post  | P value (OR, CI)  | Pre               | Post  | P value (OR, CI)  |
| Alignment of goals (/5)                      | 4.24               | 4.38  | .454 (-.5;0.5)    | 4.69               | 4.63  | .317 (-.5;0)     | 4.4                | 3.86  | .655 (-2;.5)     | 4.64              | 4.78  | .564 (-5;5)       | 4.62              | 4.70  | .655 (-5;1)       |
| Involvement in goal-setting process (/25)    | 20.71              | 20.63 | .622 (-2.5;1.5)   | 19.77              | 21.81 | .251 (-1;5)      | 21.10              | 20.71 | .498 (-4;3.5)    | 23.73             | 22.75 | .442 (-4;2)       | 22.23             | 22.56 | .458 (-2;2)       |
| Client-centeredness of goal statements (/20) | 18.10              | 17.78 | .532 (-1.43;91)   | 18.22              | 17.92 | .780 (2.08;1.68) | 17.48              | 18.06 | .612 (-3.5;3.83) | 19.18             | 17.09 | .263 (-3.33;1.42) | 18.40             | 18.33 | .128 (-4.5;1)     |
| Total C-COGS scores                          | 43.04              | 42.78 | .609 (-3.83;2.51) | 42.68              | 44.36 | .442 (3.04;5.17) | 42.98              | 42.64 | .866 (7.95;6.60) | 47.55             | 44.46 | .314 (-6.17;2.83) | 45.19             | 45.67 | .735 (-6.08;2.92) |

**Table SIV. Clients reporting they received information related to goal-setting or copies of their rehabilitation goals**

|                                           | Site 1- Inpatients |      |                                | Site 2- Inpatients |      |                                 | Site 3 -Inpatients |      |                                | Site 4- Community |       |                                | Site 5 -Community |       |                                |
|-------------------------------------------|--------------------|------|--------------------------------|--------------------|------|---------------------------------|--------------------|------|--------------------------------|-------------------|-------|--------------------------------|-------------------|-------|--------------------------------|
|                                           | Pre                | Post | Chi-square value<br>(OR,CI)    | Pre                | Post | Chi-square<br>value<br>(OR,CI)  | Pre                | Post | Chi-square<br>value<br>(OR,CI) | Pre               | Post  | Chi-square<br>value<br>(OR,CI) | Pre               | Post  | Chi-square<br>value<br>(OR,CI) |
| Provision of goal-setting information (%) | 52.94              | 37.5 | .373 (OR.53, CI1.33-2.14)      | 30.77              | 62.5 | 0.89 (OR3.75, CI-.79-17.72)     | 40                 | 57.1 | .486 (OR 2.0, CI- 2.82-14.2)   | 100               | 72.73 | .257 (OR.89, CI .71-1.12)      | 92.3              | 62.50 | 0.91 (OR.14, CI-0.11-1.68)     |
| Provision of client copies of goals (%)   | 11.75              | 75   | <0.001 (OR22.5, CI3.51-144.45) | 15.39              | 100  | <0.001 (OR 6.50, CI 1.82-23.26) | 20                 | 57.1 | .115 (OR5.33, CI.62-45.99)     | 54.55             | 72.73 | .095 (OR 6.667, CI-.61-73.03)  | 30.7              | 62.50 | .154 (OR3.75,CI .59-23.94)     |
